# Supplementary material
Source: PubMed Central journal article supplement (PMC3797629)

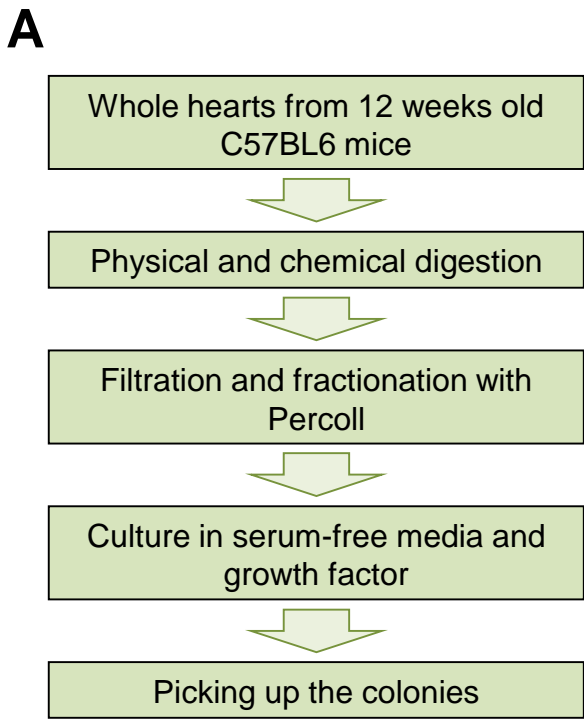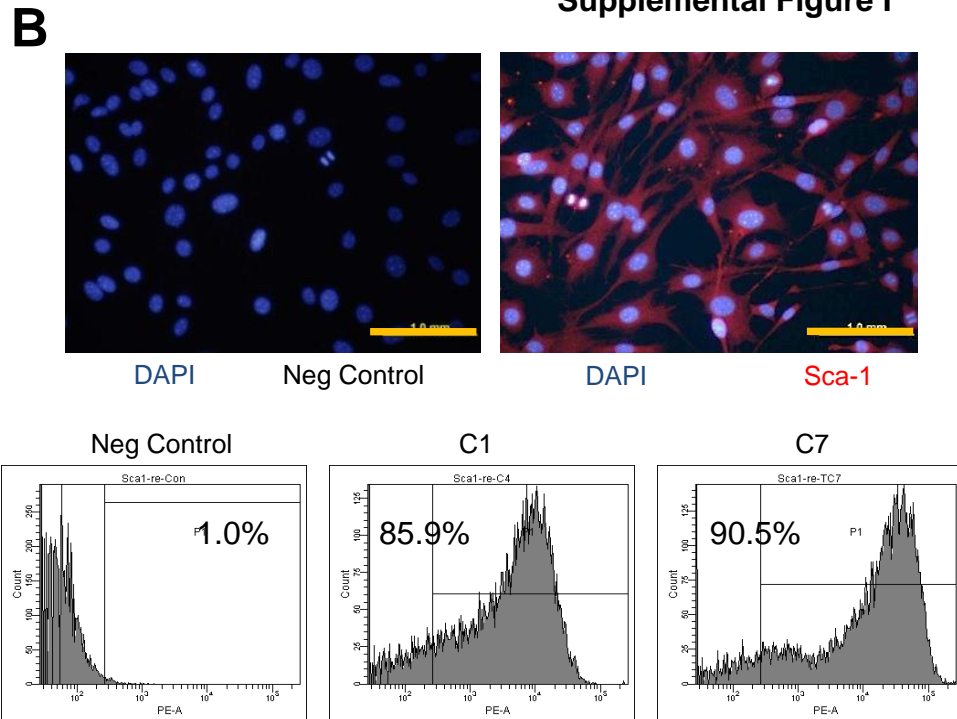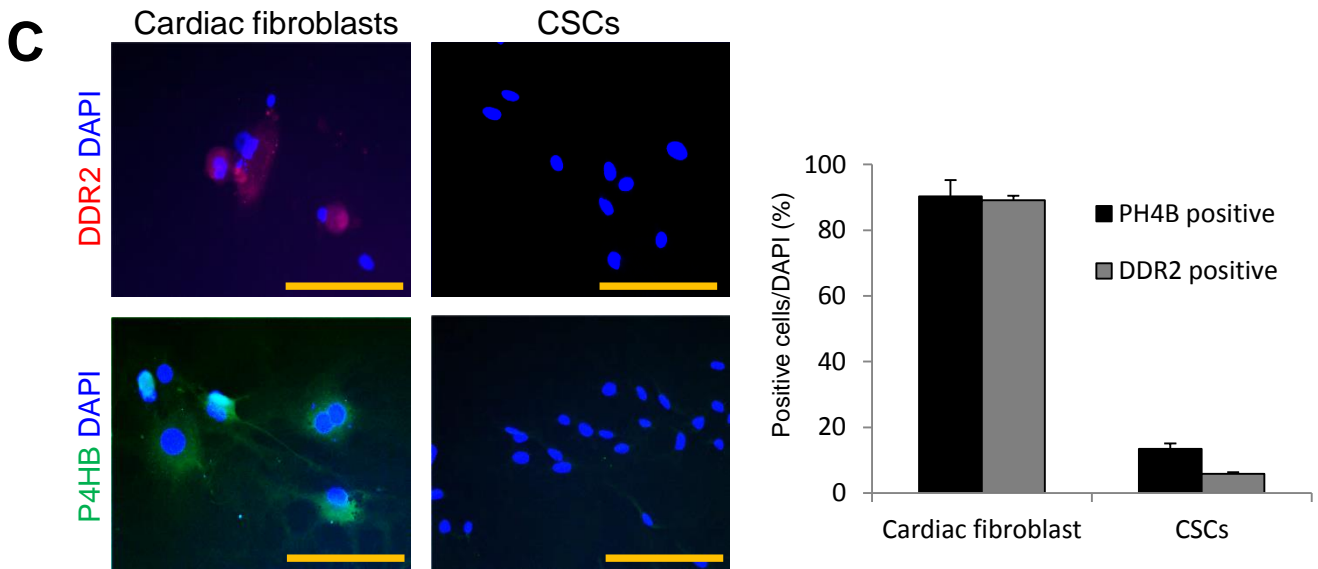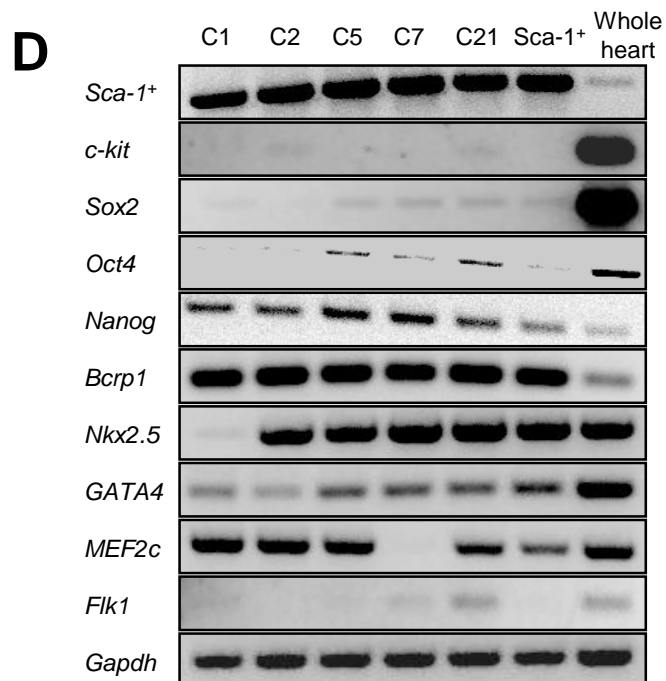

**A**

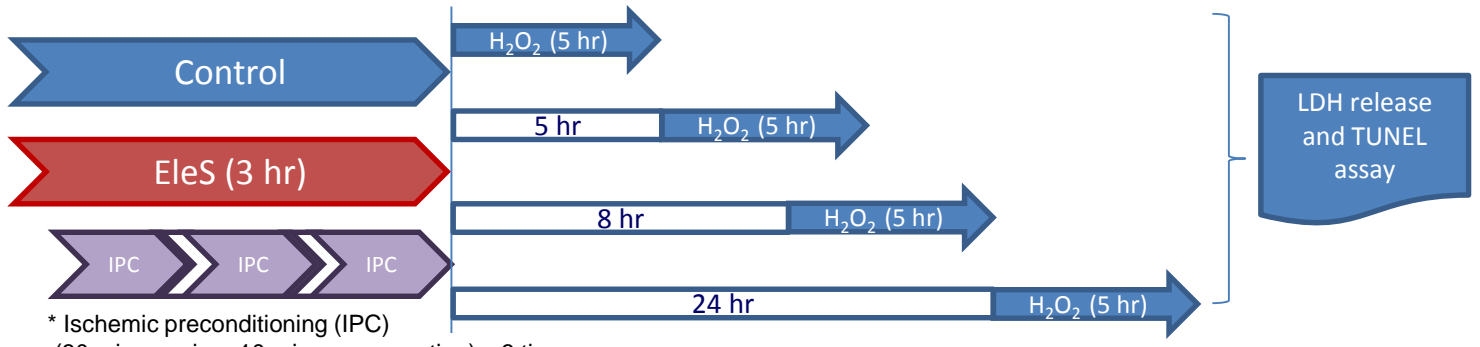

\* Ischemic preconditioning (IPC)  
:(30 min anoxia + 10 min reoxygenation) x 3 times  
(A modified method from Kim et al., 2008)

**A**

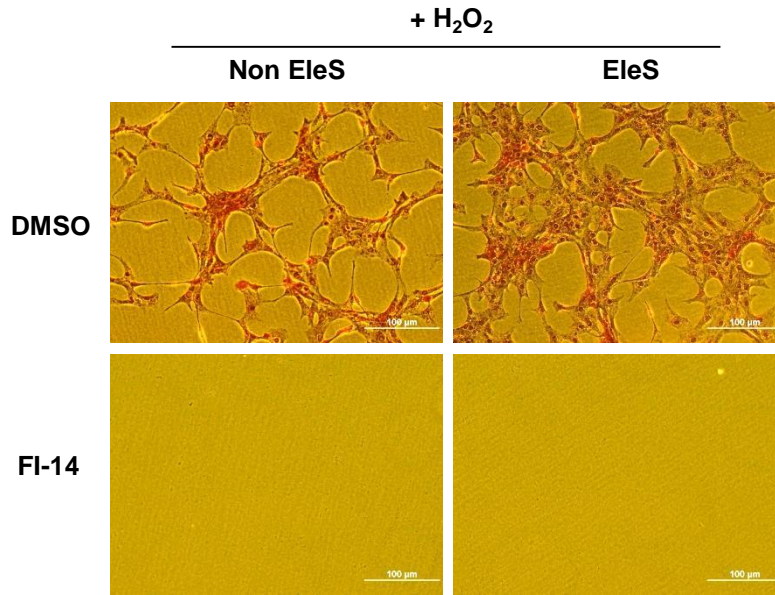

**B**

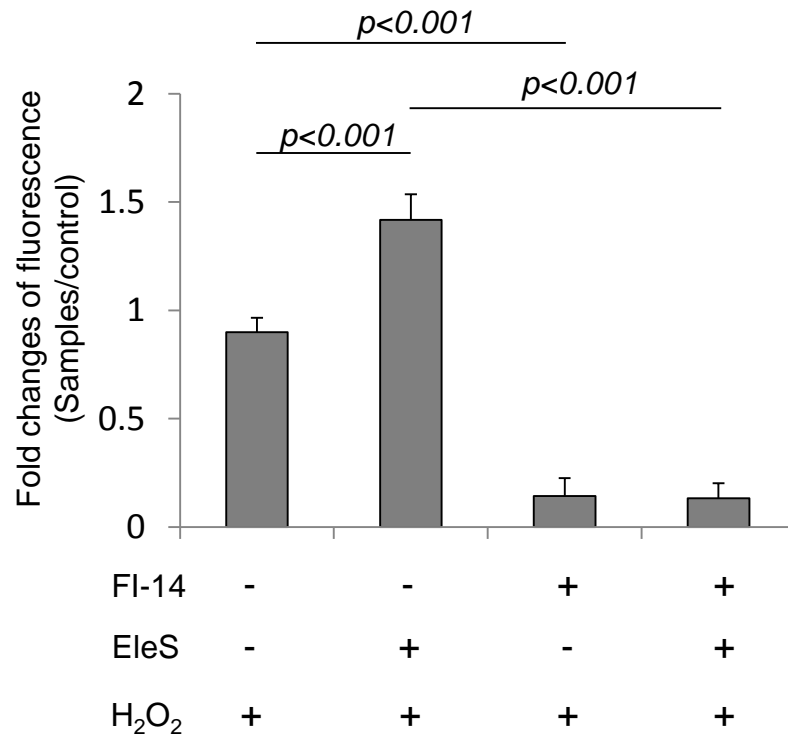

Supplement: supp_cvt192_cvt192supp_figs.pdf [file supp_cvt192_cvt192supp_figs.pdf]
